# Supplementary material for: Mitigation of Gastric Damage Using Cinnamomum cassia Extract: Network Pharmacological Analysis of Active Compounds and Protection Effects in Rats
Source: MDPI journal article supplement (doi:10.3390/plants11060716), 2022-03-08
Supplement: s1 [file s1]

# Mitigation of gastric damage using *Cinnamomum cassia* extract: Network pharmacological analysis of active compounds and protection effects in rats

Ji Hwan Lee <sup>1,†</sup>, Hee Jae Kwak<sup>2,†</sup>, Dongchul Shin <sup>1</sup>, Hye Jin Seo <sup>3</sup>, Shin Jung Park <sup>3</sup>, Bo-Hee Hong <sup>3</sup>, Myoung-Sook Shin <sup>1</sup>, Seung Hyun Kim<sup>2,\*</sup>, Ki Sung Kang <sup>1,\*</sup>

<sup>1</sup> College of Korean Medicine, Gachon University, Seongnam, 13120, Republic of Korea; kleert26@gmail.com (J.H.L.), sdc2510@gmail.com (D.S.)

<sup>2</sup> College of Pharmacy, Yonsei Institute of Pharmaceutical Sciences, Yonsei University, Incheon, Republic of Korea; moon3685@naver.com (H.J.K.), kimsh11@yonsei.ac.kr (S.H.K.)

<sup>3</sup> Chong Kun Dang (CKD) Pharm Research Institute, Yongin-si, 16995, Republic of Korea

\* Correspondence: Ki Sung Kang; Tel.: +82-31-750-5402; e-mail: kkang@gachon.ac.kr; 00000; Tel.: +82-32-749-4514; e-mail: kimsh11@yonsei.ac.kr.

† These authors contributed equally to this work.

---

**Tables**

**Table S1.** List of physicochemical properties, QED, and OB of compounds from *C. cassia*

**Table S2.** List of expected active compounds from *C. cassia*

**Table S1.** List of physicochemical properties, QED, and OB of compounds from *C. cassia*

| No. | Compound Name                                          | MW     | ALOGP | HBA | HBD | PSA    | ROTB | AROM | ALERTS | QED   | OB    |
|-----|--------------------------------------------------------|--------|-------|-----|-----|--------|------|------|--------|-------|-------|
| 1   | $\alpha$ -terpineol                                    | 154.25 | 2.58  | 1   | 1   | 20.23  | 1    | 0    | 1      | 0.575 | TRUE  |
| 2   | $\beta$ -bisabolene                                    | 204.35 | 4.83  | 0   | 0   | 0.00   | 4    | 0    | 1      | 0.575 | TRUE  |
| 3   | $\alpha$ -bisabolol                                    | 222.37 | 3.76  | 1   | 1   | 20.23  | 4    | 0    | 1      | 0.718 | TRUE  |
| 4   | linalool                                               | 154.25 | 2.66  | 1   | 1   | 20.23  | 4    | 0    | 1      | 0.617 | TRUE  |
| 5   | camphene                                               | 136.23 | 3.43  | 0   | 0   | 0.00   | 0    | 0    | 1      | 0.447 | TRUE  |
| 6   | $\beta$ -Pinene                                        | 136.23 | 3.42  | 0   | 0   | 0.00   | 0    | 0    | 1      | 0.447 | TRUE  |
| 7   | camphor                                                | 152.23 | 2.37  | 1   | 0   | 17.07  | 0    | 0    | 0      | 0.521 | TRUE  |
| 8   | geranyl acetate                                        | 196.29 | 3.21  | 2   | 0   | 26.30  | 6    | 0    | 1      | 0.610 | TRUE  |
| 9   | cinnzeylanol                                           | 384.46 | 0.54  | 7   | 6   | 95.45  | 1    | 0    | 0      | 0.393 | TRUE  |
| 10  | anhydrocinnzeylanol                                    | 366.45 | 1.36  | 6   | 4   | 107.22 | 1    | 0    | 1      | 0.522 | TRUE  |
| 11  | cinnzeylanone                                          | 382.45 | 0.37  | 7   | 5   | 127.45 | 1    | 0    | 0      | 0.443 | TRUE  |
| 12  | anhydrocinnzeylanine                                   | 408.49 | 1.44  | 7   | 3   | 113.29 | 3    | 0    | 2      | 0.478 | TRUE  |
| 13  | cinn cassiol A 19-O- $\beta$ -D-glucopyranoside        | 544.59 | -1.04 | 12  | 8   | 206.60 | 5    | 0    | 1      | 0.195 | FALSE |
| 14  | cinn cassiol A                                         | 382.45 | 0.52  | 7   | 5   | 127.45 | 2    | 0    | 1      | 0.441 | TRUE  |
| 15  | cinn cassiol B                                         | 400.46 | -0.05 | 8   | 7   | 150.84 | 2    | 0    | 0      | 0.341 | FALSE |
| 16  | cinn cassiol C                                         | 380.43 | 0.46  | 7   | 4   | 124.29 | 2    | 0    | 0      | 0.549 | TRUE  |
| 17  | cinn cassiol E                                         | 398.45 | -0.22 | 8   | 6   | 139.84 | 1    | 0    | 0      | 0.356 | FALSE |
| 18  | cinn cassiol F                                         | 398.45 | 0.4   | 8   | 5   | 136.68 | 1    | 0    | 0      | 0.428 | FALSE |
| 19  | cinn cassiol G                                         | 382.45 | 0.48  | 7   | 5   | 127.45 | 2    | 0    | 1      | 0.440 | TRUE  |
| 20  | 16-O- $\beta$ -D-glucopyranosyl-19-deoxycinn cassiol G | 544.59 | -0.87 | 12  | 8   | 206.60 | 5    | 0    | 1      | 0.199 | FALSE |
| 21  | cinnacasol                                             | 382.45 | 0.52  | 7   | 5   | 127.45 | 2    | 0    | 1      | 0.441 | TRUE  |
| 22  | perseanol                                              | 384.46 | 0.19  | 7   | 6   | 130.61 | 1    | 0    | 0      | 0.380 | FALSE |
| 23  | cinn cassiol D1                                        | 352.47 | 1.69  | 5   | 4   | 90.15  | 2    | 0    | 0      | 0.607 | TRUE  |
| 24  | cinn cassiol D1 glucoside                              | 514.61 | 0.03  | 10  | 7   | 169.30 | 5    | 0    | 0      | 0.266 | FALSE |
| 25  | cinn cassiol D2                                        | 368.46 | 0.96  | 6   | 5   | 110.38 | 2    | 0    | 0      | 0.497 | TRUE  |
| 26  | cinn cassiol D3                                        | 368.46 | 0.87  | 6   | 5   | 110.38 | 2    | 0    | 0      | 0.495 | TRUE  |
| 27  | 18-hydroxyperseanol                                    | 400.46 | -0.96 | 8   | 7   | 150.84 | 1    | 0    | 0      | 0.297 | FALSE |
| 28  | caryophyllene                                          | 204.35 | 4.24  | 0   | 0   | 0.00   | 0    | 0    | 1      | 0.518 | TRUE  |
| 29  | $\alpha$ -cubebene                                     | 204.35 | 4.31  | 0   | 0   | 0.00   | 1    | 0    | 1      | 0.558 | TRUE  |
| 30  | (-)-isolekene                                          | 204.35 | 4.26  | 0   | 0   | 0.00   | 0    | 0    | 1      | 0.517 | TRUE  |
| 31  | patchouli alcohol                                      | 222.37 | 3.56  | 1   | 1   | 20.23  | 0    | 0    | 0      | 0.664 | TRUE  |

|    |                                                    |        |       |    |   |        |    |   |   |       |       |
|----|----------------------------------------------------|--------|-------|----|---|--------|----|---|---|-------|-------|
| 32 | $\alpha$ -copaene                                  | 204.35 | 4.3   | 0  | 0 | 0.00   | 1  | 0 | 1 | 0.559 | TRUE  |
| 33 | $\alpha$ -muurolene                                | 204.35 | 4.08  | 0  | 0 | 0.00   | 1  | 0 | 1 | 0.565 | TRUE  |
| 34 | $\alpha$ -cadinol                                  | 222.37 | 3.43  | 1  | 1 | 20.23  | 1  | 0 | 1 | 0.674 | TRUE  |
| 35 | 1-(1,5-dimethyl-4-hexenyl)-4-methylbenzene         | 202.34 | 4.86  | 0  | 0 | 0.00   | 4  | 1 | 1 | 0.612 | TRUE  |
| 36 | cedrene                                            | 204.35 | 4.36  | 0  | 0 | 0.00   | 0  | 0 | 1 | 0.514 | TRUE  |
| 37 | $\alpha$ -calacorene                               | 200.32 | 4.38  | 0  | 0 | 0.00   | 1  | 1 | 0 | 0.631 | TRUE  |
| 38 | cinnamoid A                                        | 238.37 | 2.67  | 2  | 2 | 40.46  | 1  | 0 | 0 | 0.737 | TRUE  |
| 39 | cinnamoid B                                        | 252.35 | 2.08  | 3  | 2 | 57.53  | 1  | 1 | 1 | 0.752 | TRUE  |
| 40 | cinnamoid C                                        | 252.35 | 2.08  | 3  | 2 | 57.53  | 1  | 1 | 1 | 0.752 | TRUE  |
| 41 | cinnamoid D                                        | 236.35 | 2.37  | 2  | 2 | 40.46  | 1  | 0 | 1 | 0.686 | TRUE  |
| 42 | cinnamoid E                                        | 234.33 | 2.47  | 2  | 1 | 37.30  | 1  | 0 | 0 | 0.756 | TRUE  |
| 43 | 15-hydroxy- $\alpha$ -cadinol                      | 238.37 | 2.58  | 2  | 2 | 40.46  | 2  | 0 | 1 | 0.726 | TRUE  |
| 44 | ent-4 $\beta$ ,10 $\alpha$ -dihydroxyaromadendrane | 238.37 | 2.59  | 2  | 2 | 40.46  | 0  | 0 | 0 | 0.681 | TRUE  |
| 45 | cinnamaldehyde                                     | 132.16 | 1.97  | 1  | 0 | 17.07  | 2  | 1 | 2 | 0.444 | TRUE  |
| 46 | cis-2-methoxycinnamic acid                         | 178.18 | 1.71  | 3  | 1 | 46.53  | 3  | 1 | 1 | 0.716 | TRUE  |
| 47 | <i>o</i> -methoxycinnamaldehyde                    | 162.19 | 2.03  | 2  | 0 | 26.30  | 3  | 1 | 2 | 0.502 | TRUE  |
| 48 | 2-methoxycinnamaldehyde                            | 162.19 | 2.03  | 2  | 0 | 26.30  | 3  | 1 | 2 | 0.502 | TRUE  |
| 49 | cinnamyl alcohol                                   | 134.18 | 1.96  | 1  | 1 | 20.23  | 2  | 1 | 0 | 0.655 | TRUE  |
| 50 | cis-cinnamaldehyde                                 | 132.16 | 1.97  | 1  | 0 | 17.07  | 2  | 1 | 2 | 0.444 | TRUE  |
| 51 | trans-cinnamaldehyde                               | 132.16 | 1.97  | 1  | 0 | 17.07  | 2  | 1 | 2 | 0.444 | TRUE  |
| 52 | ethyl cinnamate                                    | 176.21 | 2.49  | 2  | 0 | 26.30  | 4  | 1 | 1 | 0.659 | TRUE  |
| 53 | eugenol                                            | 164.2  | 2.25  | 2  | 1 | 29.46  | 3  | 1 | 1 | 0.694 | TRUE  |
| 54 | cinnamyl acetate                                   | 176.21 | 2.33  | 2  | 0 | 26.30  | 4  | 1 | 0 | 0.703 | TRUE  |
| 55 | 2-hydroxycinnamic acid                             | 164.16 | 1.4   | 3  | 2 | 57.53  | 2  | 1 | 1 | 0.649 | TRUE  |
| 56 | 2-hydroxycinnamaldehyde                            | 148.16 | 1.63  | 2  | 1 | 37.30  | 2  | 1 | 2 | 0.511 | TRUE  |
| 57 | 4-methoxycinnamaldehyde                            | 162.19 | 1.95  | 2  | 0 | 26.30  | 3  | 1 | 2 | 0.501 | TRUE  |
| 58 | cinnamic acid                                      | 148.16 | 1.79  | 2  | 1 | 37.30  | 2  | 1 | 1 | 0.649 | TRUE  |
| 59 | cinnacasside A                                     | 512.55 | 0.58  | 11 | 6 | 175.37 | 9  | 1 | 0 | 0.273 | FALSE |
| 60 | cinnacasside C                                     | 512.55 | 0.58  | 11 | 6 | 175.37 | 9  | 1 | 0 | 0.273 | FALSE |
| 61 | cinnacasside B                                     | 512.55 | 0.58  | 11 | 6 | 175.37 | 9  | 1 | 0 | 0.273 | FALSE |
| 62 | cinnacassoside D                                   | 330.33 | -1.34 | 8  | 6 | 139.84 | 6  | 1 | 0 | 0.377 | FALSE |
| 63 | cinnacassoside A                                   | 540.56 | 0.13  | 12 | 8 | 198.76 | 12 | 2 | 0 | 0.181 | FALSE |
| 64 | cinnacassoside B                                   | 654.66 | -0.32 | 15 | 8 | 226.45 | 13 | 2 | 0 | 0.139 | FALSE |

|    |                                                             |        |       |    |   |        |    |   |   |       |       |
|----|-------------------------------------------------------------|--------|-------|----|---|--------|----|---|---|-------|-------|
| 65 | cinnacassoside C                                            | 464.42 | -1.82 | 13 | 7 | 196.99 | 8  | 1 | 0 | 0.227 | FALSE |
| 66 | cinnassin E                                                 | 404.41 | 1.82  | 8  | 3 | 114.68 | 10 | 2 | 2 | 0.406 | TRUE  |
| 67 | cinnassin D                                                 | 508.52 | 2.7   | 9  | 3 | 123.91 | 8  | 3 | 1 | 0.394 | TRUE  |
| 68 | picrasmalignan A                                            | 534.55 | 3.1   | 9  | 3 | 123.91 | 9  | 3 | 2 | 0.281 | TRUE  |
| 69 | (+)-leptolepisol C                                          | 498.52 | 2.42  | 9  | 5 | 138.07 | 9  | 3 | 0 | 0.301 | FALSE |
| 70 | (-)-(7R,8S,7'R,8'S)-syringaresinol                          | 418.44 | 2.33  | 8  | 2 | 95.84  | 6  | 2 | 0 | 0.738 | TRUE  |
| 71 | (+)-isolariciresinol                                        | 360.4  | 2.02  | 6  | 4 | 99.38  | 5  | 2 | 0 | 0.651 | TRUE  |
| 72 | (-)-secroisolariciresinol                                   | 362.42 | 2.5   | 6  | 4 | 99.38  | 9  | 2 | 0 | 0.547 | TRUE  |
| 73 | (7S,8R)-guaiacylglycerol- $\beta$ -coniferyl aldehyde ether | 374.38 | 1.95  | 7  | 3 | 105.45 | 9  | 2 | 2 | 0.455 | TRUE  |
| 74 | (7S,8R)-lawsonicin                                          | 360.4  | 2.36  | 6  | 3 | 88.38  | 7  | 2 | 0 | 0.703 | TRUE  |
| 75 | 5'-methoxylariciresinol                                     | 390.43 | 2.34  | 7  | 3 | 97.61  | 7  | 2 | 0 | 0.668 | TRUE  |
| 76 | (+)-(7'R,8R,8'R)-5,5'-dimethoxylariciresinol                | 420.45 | 2.32  | 8  | 3 | 106.84 | 8  | 2 | 0 | 0.597 | TRUE  |
| 77 | 2-ethyl-5-propylphenol                                      | 164.24 | 3.12  | 1  | 1 | 20.23  | 3  | 1 | 0 | 0.727 | TRUE  |
| 78 | 3,4-dimethoxyphenethyl alcohol                              | 182.22 | 1.54  | 3  | 1 | 38.69  | 4  | 1 | 0 | 0.767 | TRUE  |
| 79 | benzaldehyde                                                | 106.12 | 1.57  | 1  | 0 | 17.07  | 1  | 1 | 0 | 0.531 | TRUE  |
| 80 | phenylethyl alcohol                                         | 122.16 | 1.64  | 1  | 1 | 37.38  | 2  | 1 | 0 | 0.636 | TRUE  |
| 81 | benzenepropanal                                             | 134.18 | 1.91  | 1  | 0 | 17.07  | 3  | 1 | 1 | 0.577 | TRUE  |
| 82 | acetophenone                                                | 120.15 | 1.82  | 1  | 0 | 17.07  | 1  | 1 | 0 | 0.552 | TRUE  |
| 83 | styrene                                                     | 104.15 | 2.72  | 0  | 0 | 0.00   | 1  | 1 | 0 | 0.514 | TRUE  |
| 84 | rosavin                                                     | 428.43 | -1.07 | 10 | 6 | 158.30 | 7  | 1 | 0 | 0.316 | FALSE |
| 85 | coumarin                                                    | 146.14 | 1.82  | 2  | 0 | 30.21  | 0  | 1 | 1 | 0.522 | TRUE  |
| 86 | evofolin B                                                  | 318.32 | 1.87  | 6  | 3 | 96.22  | 6  | 2 | 0 | 0.752 | TRUE  |
| 87 | cinnassin C                                                 | 434.44 | 2.19  | 9  | 3 | 123.91 | 8  | 2 | 0 | 0.573 | TRUE  |
| 88 | cinnassin B                                                 | 392.4  | 1.8   | 8  | 3 | 106.84 | 6  | 2 | 0 | 0.683 | TRUE  |
| 89 | Epianhydrocinnzeylanol                                      | 366.45 | 1.36  | 6  | 4 | 107.22 | 1  | 0 | 1 | 0.522 | TRUE  |
| 90 | Cinnacasiol H                                               | 382.45 | 0.56  | 7  | 5 | 127.45 | 1  | 0 | 1 | 0.419 | TRUE  |
| 91 | Caryolane-1,9 $\beta$ -diol                                 | 238.37 | 2.75  | 2  | 2 | 40.46  | 0  | 0 | 0 | 0.681 | TRUE  |
| 92 | Clovane-2 $\beta$ ,9 $\alpha$ -diol                         | 238.37 | 2.79  | 2  | 2 | 40.46  | 0  | 0 | 0 | 0.681 | TRUE  |
| 93 | Mustakone                                                   | 218.33 | 3.36  | 1  | 0 | 17.07  | 1  | 0 | 0 | 0.659 | TRUE  |
| 94 | Aromadendrane-4 $\beta$ ,10 $\alpha$ -diol                  | 238.37 | 2.59  | 2  | 2 | 40.46  | 0  | 0 | 0 | 0.681 | TRUE  |
| 95 | Litseachromolaevane A                                       | 234.33 | 3.37  | 2  | 1 | 37.30  | 5  | 1 | 0 | 0.848 | TRUE  |
| 96 | Coniferaldehyde                                             | 178.18 | 1.56  | 3  | 1 | 46.53  | 3  | 1 | 2 | 0.564 | TRUE  |
| 97 | Cassiferaldehyde                                            | 178.18 | 1.55  | 3  | 1 | 46.53  | 3  | 1 | 2 | 0.564 | TRUE  |

---

|     |                             |        |      |   |   |        |   |   |   |       |      |
|-----|-----------------------------|--------|------|---|---|--------|---|---|---|-------|------|
| 98  | Sinapaldehyde               | 208.21 | 1.54 | 4 | 1 | 55.76  | 4 | 1 | 2 | 0.602 | TRUE |
| 99  | 1-Phenyl-1,2,3-propanetriol | 168.19 | 0.42 | 3 | 3 | 60.69  | 3 | 1 | 0 | 0.613 | TRUE |
| 100 | cinnacassin A               | 286.28 | 1.91 | 5 | 3 | 86.99  | 2 | 2 | 1 | 0.734 | TRUE |
| 101 | (+)-Syringaresinol          | 418.44 | 2.33 | 8 | 2 | 95.84  | 6 | 2 | 0 | 0.738 | TRUE |
| 102 | Pinoresinol                 | 358.39 | 2.26 | 6 | 2 | 77.38  | 4 | 2 | 0 | 0.873 | TRUE |
| 103 | (-)-Isolariciresinol        | 360.4  | 2.02 | 6 | 4 | 99.38  | 5 | 2 | 0 | 0.651 | TRUE |
| 104 | Polystachyol                | 420.45 | 2.04 | 8 | 4 | 117.84 | 7 | 2 | 0 | 0.538 | TRUE |
| 105 | Lariciresinol               | 360.4  | 2.38 | 6 | 3 | 88.38  | 6 | 2 | 0 | 0.733 | TRUE |
| 106 | Ciwujiatone                 | 434.44 | 1.78 | 9 | 3 | 123.91 | 8 | 2 | 0 | 0.570 | TRUE |
| 107 | (-)-Secoisolariciresinol    | 362.42 | 2.5  | 6 | 4 | 99.38  | 9 | 2 | 0 | 0.547 | TRUE |
| 108 | Syringaldehyde              | 182.17 | 0.93 | 4 | 1 | 55.76  | 3 | 1 | 0 | 0.755 | TRUE |
| 109 | Vanillin                    | 152.15 | 1.2  | 3 | 1 | 46.53  | 2 | 1 | 1 | 0.647 | TRUE |
| 110 | Protocatechualdehyde        | 138.12 | 0.8  | 3 | 2 | 57.53  | 1 | 1 | 2 | 0.445 | TRUE |
| 111 | Vanillic acid               | 168.15 | 1.08 | 4 | 2 | 66.76  | 2 | 1 | 0 | 0.693 | TRUE |
| 112 | Isovanillic acid            | 168.15 | 0.98 | 4 | 2 | 66.76  | 2 | 1 | 0 | 0.690 | TRUE |
| 113 | cis-4-Hydroxymellein        | 194.18 | 1.06 | 4 | 2 | 66.76  | 0 | 1 | 0 | 0.648 | TRUE |
| 114 | 4-hydroxycinnamaldehyde     | 148.16 | 1.58 | 2 | 2 | 37.30  | 2 | 1 | 2 | 0.62  | TRUE |

---

**Table S2.** List of expected active compounds from *C. cassia*

| No. | Compound Name                              | MW     | ALOGP | HBA | HBD | PSA    | ROTB | AROM | ALERTS | QED   | OB   |
|-----|--------------------------------------------|--------|-------|-----|-----|--------|------|------|--------|-------|------|
| 1   | $\alpha$ -terpineol                        | 154.25 | 2.58  | 1   | 1   | 20.23  | 1    | 0    | 1      | 0.575 | TRUE |
| 2   | $\beta$ -bisabolene                        | 204.35 | 4.83  | 0   | 0   | 0.00   | 4    | 0    | 1      | 0.575 | TRUE |
| 3   | $\alpha$ -bisabolol                        | 222.37 | 3.76  | 1   | 1   | 20.23  | 4    | 0    | 1      | 0.718 | TRUE |
| 4   | linalool                                   | 154.25 | 2.66  | 1   | 1   | 20.23  | 4    | 0    | 1      | 0.617 | TRUE |
| 5   | camphene                                   | 136.23 | 3.43  | 0   | 0   | 0.00   | 0    | 0    | 1      | 0.447 | TRUE |
| 6   | $\beta$ -Pinene                            | 136.23 | 3.42  | 0   | 0   | 0.00   | 0    | 0    | 1      | 0.447 | TRUE |
| 7   | camphor                                    | 152.23 | 2.37  | 1   | 0   | 17.07  | 0    | 0    | 0      | 0.521 | TRUE |
| 8   | geranyl acetate                            | 196.29 | 3.21  | 2   | 0   | 26.30  | 6    | 0    | 1      | 0.610 | TRUE |
| 9   | anhydrocinnzeylanol                        | 366.45 | 1.36  | 6   | 4   | 107.22 | 1    | 0    | 1      | 0.522 | TRUE |
| 10  | cinnzeylanone                              | 382.45 | 0.37  | 7   | 5   | 127.45 | 1    | 0    | 0      | 0.443 | TRUE |
| 11  | anhydrocinnzeylanine                       | 408.49 | 1.44  | 7   | 3   | 113.29 | 3    | 0    | 2      | 0.478 | TRUE |
| 12  | cinncassiol A                              | 382.45 | 0.52  | 7   | 5   | 127.45 | 2    | 0    | 1      | 0.441 | TRUE |
| 13  | cinncassiol C                              | 380.43 | 0.46  | 7   | 4   | 124.29 | 2    | 0    | 0      | 0.549 | TRUE |
| 14  | cinncassiol G                              | 382.45 | 0.48  | 7   | 5   | 127.45 | 2    | 0    | 1      | 0.440 | TRUE |
| 15  | cinnacasol                                 | 382.45 | 0.52  | 7   | 5   | 127.45 | 2    | 0    | 1      | 0.441 | TRUE |
| 16  | cinncassiol D1                             | 352.47 | 1.69  | 5   | 4   | 90.15  | 2    | 0    | 0      | 0.607 | TRUE |
| 17  | cinncassiol D2                             | 368.46 | 0.96  | 6   | 5   | 110.38 | 2    | 0    | 0      | 0.497 | TRUE |
| 18  | cinncassiol D3                             | 368.46 | 0.87  | 6   | 5   | 110.38 | 2    | 0    | 0      | 0.495 | TRUE |
| 19  | caryophyllene                              | 204.35 | 4.24  | 0   | 0   | 0.00   | 0    | 0    | 1      | 0.518 | TRUE |
| 20  | $\alpha$ -cubebene                         | 204.35 | 4.31  | 0   | 0   | 0.00   | 1    | 0    | 1      | 0.558 | TRUE |
| 21  | (-)-isolekene                              | 204.35 | 4.26  | 0   | 0   | 0.00   | 0    | 0    | 1      | 0.517 | TRUE |
| 22  | patchouli alcohol                          | 222.37 | 3.56  | 1   | 1   | 20.23  | 0    | 0    | 0      | 0.664 | TRUE |
| 23  | $\alpha$ -copaene                          | 204.35 | 4.30  | 0   | 0   | 0.00   | 1    | 0    | 1      | 0.559 | TRUE |
| 24  | $\alpha$ -muurolene                        | 204.35 | 4.08  | 0   | 0   | 0.00   | 1    | 0    | 1      | 0.565 | TRUE |
| 25  | $\alpha$ -cadinol                          | 222.37 | 3.43  | 1   | 1   | 20.23  | 1    | 0    | 1      | 0.674 | TRUE |
| 26  | 1-(1,5-dimethyl-4-hexenyl)-4-methylbenzene | 202.34 | 4.86  | 0   | 0   | 0.00   | 4    | 1    | 1      | 0.612 | TRUE |
| 27  | cedrene                                    | 204.35 | 4.36  | 0   | 0   | 0.00   | 0    | 0    | 1      | 0.514 | TRUE |
| 28  | $\alpha$ -calacorene                       | 200.32 | 4.38  | 0   | 0   | 0.00   | 1    | 1    | 0      | 0.631 | TRUE |

|    |                                                             |        |      |   |   |        |    |   |   |       |      |
|----|-------------------------------------------------------------|--------|------|---|---|--------|----|---|---|-------|------|
| 29 | cinnamoid A                                                 | 238.37 | 2.67 | 2 | 2 | 40.46  | 1  | 0 | 0 | 0.737 | TRUE |
| 30 | cinnamoid B                                                 | 252.35 | 2.08 | 3 | 2 | 57.53  | 1  | 1 | 1 | 0.752 | TRUE |
| 31 | cinnamoid C                                                 | 252.35 | 2.08 | 3 | 2 | 57.53  | 1  | 1 | 1 | 0.752 | TRUE |
| 32 | cinnamoid D                                                 | 236.35 | 2.37 | 2 | 2 | 40.46  | 1  | 0 | 1 | 0.686 | TRUE |
| 33 | cinnamoid E                                                 | 234.33 | 2.47 | 2 | 1 | 37.30  | 1  | 0 | 0 | 0.756 | TRUE |
| 34 | 15-hydroxy- $\alpha$ -cadinol                               | 238.37 | 2.58 | 2 | 2 | 40.46  | 2  | 0 | 1 | 0.726 | TRUE |
| 35 | ent-4 $\beta$ ,10 $\alpha$ -dihydroxyaromadendrane          | 238.37 | 2.59 | 2 | 2 | 40.46  | 0  | 0 | 0 | 0.681 | TRUE |
| 36 | cinnamaldehyde                                              | 132.16 | 1.97 | 1 | 0 | 17.07  | 2  | 1 | 2 | 0.444 | TRUE |
| 37 | cis-2-methoxycinnamic acid                                  | 178.18 | 1.71 | 3 | 1 | 46.53  | 3  | 1 | 1 | 0.716 | TRUE |
| 38 | <i>o</i> -methoxycinnamaldehyde                             | 162.19 | 2.03 | 2 | 0 | 26.30  | 3  | 1 | 2 | 0.502 | TRUE |
| 39 | 2-methoxycinnamaldehyde                                     | 162.19 | 2.03 | 2 | 0 | 26.30  | 3  | 1 | 2 | 0.502 | TRUE |
| 40 | cinnamyl alcohol                                            | 134.18 | 1.96 | 1 | 1 | 20.23  | 2  | 1 | 0 | 0.655 | TRUE |
| 41 | cis-cinnamaldehyde                                          | 132.16 | 1.97 | 1 | 0 | 17.07  | 2  | 1 | 2 | 0.444 | TRUE |
| 42 | trans-cinnamaldehyde                                        | 132.16 | 1.97 | 1 | 0 | 17.07  | 2  | 1 | 2 | 0.444 | TRUE |
| 43 | ethyl cinnamate                                             | 176.21 | 2.49 | 2 | 0 | 26.30  | 4  | 1 | 1 | 0.659 | TRUE |
| 44 | eugenol                                                     | 164.2  | 2.25 | 2 | 1 | 29.46  | 3  | 1 | 1 | 0.694 | TRUE |
| 45 | cinnamyl acetate                                            | 176.21 | 2.33 | 2 | 0 | 26.30  | 4  | 1 | 0 | 0.703 | TRUE |
| 46 | 2-hydroxycinnamic acid                                      | 164.16 | 1.40 | 3 | 2 | 57.53  | 2  | 1 | 1 | 0.649 | TRUE |
| 47 | 2-hydroxycinnamaldehyde                                     | 148.16 | 1.63 | 2 | 1 | 37.30  | 2  | 1 | 2 | 0.511 | TRUE |
| 48 | 4-methoxycinnamaldehyde                                     | 162.19 | 1.95 | 2 | 0 | 26.30  | 3  | 1 | 2 | 0.501 | TRUE |
| 49 | cinnamic acid                                               | 148.16 | 1.79 | 2 | 1 | 37.30  | 2  | 1 | 1 | 0.649 | TRUE |
| 50 | cinncassin E                                                | 404.41 | 1.82 | 8 | 3 | 114.68 | 10 | 2 | 2 | 0.406 | TRUE |
| 51 | (-)-(7R,8S,7'R,8'S)-syringaresinol                          | 418.44 | 2.33 | 8 | 2 | 95.84  | 6  | 2 | 0 | 0.738 | TRUE |
| 52 | (+)-isolariciresinol                                        | 360.4  | 2.02 | 6 | 4 | 99.38  | 5  | 2 | 0 | 0.651 | TRUE |
| 53 | (-)-secroisolariciresinol                                   | 362.42 | 2.50 | 6 | 4 | 99.38  | 9  | 2 | 0 | 0.547 | TRUE |
| 54 | (7S,8R)-guaiacylglycerol- $\beta$ -coniferyl aldehyde ether | 374.38 | 1.95 | 7 | 3 | 105.45 | 9  | 2 | 2 | 0.455 | TRUE |
| 55 | (7S,8R)-lawsonicin                                          | 360.4  | 2.36 | 6 | 3 | 88.38  | 7  | 2 | 0 | 0.703 | TRUE |
| 56 | 5'-methoxylariciresinol                                     | 390.43 | 2.34 | 7 | 3 | 97.61  | 7  | 2 | 0 | 0.668 | TRUE |
| 57 | (+)-(7'R,8R,8'R)-5,5'-dimethoxylariciresinol                | 420.45 | 2.32 | 8 | 3 | 106.84 | 8  | 2 | 0 | 0.597 | TRUE |
| 58 | 2-ethyl-5-propylphenol                                      | 164.24 | 3.12 | 1 | 1 | 20.23  | 3  | 1 | 0 | 0.727 | TRUE |



|    |                                            |        |      |   |   |        |   |   |   |       |      |
|----|--------------------------------------------|--------|------|---|---|--------|---|---|---|-------|------|
| 59 | 3,4-dimethoxyphenethyl alcohol             | 182.22 | 1.54 | 3 | 1 | 38.69  | 4 | 1 | 0 | 0.767 | TRUE |
| 60 | benzaldehyde                               | 106.12 | 1.57 | 1 | 0 | 17.07  | 1 | 1 | 0 | 0.531 | TRUE |
| 61 | phenylethyl alcohol                        | 122.16 | 1.64 | 1 | 1 | 37.38  | 2 | 1 | 0 | 0.636 | TRUE |
| 62 | benzenepropanal                            | 134.18 | 1.91 | 1 | 0 | 17.07  | 3 | 1 | 1 | 0.577 | TRUE |
| 63 | acetophenone                               | 120.15 | 1.82 | 1 | 0 | 17.07  | 1 | 1 | 0 | 0.552 | TRUE |
| 64 | styrene                                    | 104.15 | 2.72 | 0 | 0 | 0.00   | 1 | 1 | 0 | 0.514 | TRUE |
| 65 | coumarin                                   | 146.14 | 1.82 | 2 | 0 | 30.21  | 0 | 1 | 1 | 0.522 | TRUE |
| 66 | evofolin B                                 | 318.32 | 1.87 | 6 | 3 | 96.22  | 6 | 2 | 0 | 0.752 | TRUE |
| 67 | cinncassin C                               | 434.44 | 2.19 | 9 | 3 | 123.91 | 8 | 2 | 0 | 0.573 | TRUE |
| 68 | cinncassin B                               | 392.4  | 1.80 | 8 | 3 | 106.84 | 6 | 2 | 0 | 0.683 | TRUE |
| 69 | Epianhydrocinnzeylanol                     | 366.45 | 1.36 | 6 | 4 | 107.22 | 1 | 0 | 1 | 0.522 | TRUE |
| 70 | Cinnacasiol H                              | 382.45 | 0.56 | 7 | 5 | 127.45 | 1 | 0 | 1 | 0.419 | TRUE |
| 71 | Caryolane-1,9 $\beta$ -diol                | 238.37 | 2.75 | 2 | 2 | 40.46  | 0 | 0 | 0 | 0.681 | TRUE |
| 72 | Clovane-2 $\beta$ ,9 $\alpha$ -diol        | 238.37 | 2.79 | 2 | 2 | 40.46  | 0 | 0 | 0 | 0.681 | TRUE |
| 73 | Mustakone                                  | 218.33 | 3.36 | 1 | 0 | 17.07  | 1 | 0 | 0 | 0.659 | TRUE |
| 74 | Aromadendrane-4 $\beta$ ,10 $\alpha$ -diol | 238.37 | 2.59 | 2 | 2 | 40.46  | 0 | 0 | 0 | 0.681 | TRUE |
| 75 | Litseachromolaevane A                      | 234.33 | 3.37 | 2 | 1 | 37.30  | 5 | 1 | 0 | 0.848 | TRUE |
| 76 | Coniferaldehyde                            | 178.18 | 1.56 | 3 | 1 | 46.53  | 3 | 1 | 2 | 0.564 | TRUE |
| 77 | Cassiferaldehyde                           | 178.18 | 1.55 | 3 | 1 | 46.53  | 3 | 1 | 2 | 0.564 | TRUE |
| 78 | Sinapaldehyde                              | 208.21 | 1.54 | 4 | 1 | 55.76  | 4 | 1 | 2 | 0.602 | TRUE |
| 79 | 1-Phenyl-1,2,3-propanetriol                | 168.19 | 0.42 | 3 | 3 | 60.69  | 3 | 1 | 0 | 0.613 | TRUE |
| 80 | cinncassin A                               | 286.28 | 1.91 | 5 | 3 | 86.99  | 2 | 2 | 1 | 0.734 | TRUE |
| 81 | (+)-Syringaresinol                         | 418.44 | 2.33 | 8 | 2 | 95.84  | 6 | 2 | 0 | 0.738 | TRUE |
| 82 | Pinoresinol                                | 358.39 | 2.26 | 6 | 2 | 77.38  | 4 | 2 | 0 | 0.873 | TRUE |
| 83 | (-)-Isolariciresinol                       | 360.4  | 2.02 | 6 | 4 | 99.38  | 5 | 2 | 0 | 0.651 | TRUE |
| 84 | Polystachyol                               | 420.45 | 2.04 | 8 | 4 | 117.84 | 7 | 2 | 0 | 0.538 | TRUE |
| 85 | Lariciresinol                              | 360.4  | 2.38 | 6 | 3 | 88.38  | 6 | 2 | 0 | 0.733 | TRUE |
| 86 | Ciwujiatone                                | 434.44 | 1.78 | 9 | 3 | 123.91 | 8 | 2 | 0 | 0.570 | TRUE |
| 87 | (-)-Secoisolariciresinol                   | 362.42 | 2.50 | 6 | 4 | 99.38  | 9 | 2 | 0 | 0.547 | TRUE |
| 88 | Syringaldehyde                             | 182.17 | 0.93 | 4 | 1 | 55.76  | 3 | 1 | 0 | 0.755 | TRUE |

---

|    |                         |        |      |   |   |       |   |   |   |       |      |
|----|-------------------------|--------|------|---|---|-------|---|---|---|-------|------|
| 89 | Vanillin                | 152.15 | 1.20 | 3 | 1 | 46.53 | 2 | 1 | 1 | 0.647 | TRUE |
| 90 | Protocatechualdehyde    | 138.12 | 0.80 | 3 | 2 | 57.53 | 1 | 1 | 2 | 0.445 | TRUE |
| 91 | Vanillic acid           | 168.15 | 1.08 | 4 | 2 | 66.76 | 2 | 1 | 0 | 0.693 | TRUE |
| 92 | Isovanillic acid        | 168.15 | 0.98 | 4 | 2 | 66.76 | 2 | 1 | 0 | 0.690 | TRUE |
| 93 | cis-4-Hydroxymellein    | 194.18 | 1.06 | 4 | 2 | 66.76 | 0 | 1 | 0 | 0.648 | TRUE |
| 94 | 4-hydroxycinnamaldehyde | 148.16 | 1.58 | 2 | 2 | 37.30 | 2 | 1 | 2 | 0.620 | TRUE |

---
